# Supplementary material for: Plasmin and chymotrypsin have distinct preferences for channel activating cleavage sites in the γ subunit of the human epithelial sodium channel
Source: PubMed Central journal article supplement — J Gen Physiol. 2012 Oct;140(4):375–89. doi: 10.1085/jgp.201110763 (PMC3457690; doi:10.1085/jgp.201110763), 2012-10
Supplement: supp_jgp.201110763_JGP_201110763_sm.pdf [file supp_jgp.201110763_JGP_201110763_sm.pdf]

Haerteis et al., <http://www.jgp.org/cgi/content/full/jgp.201110763/DC1>

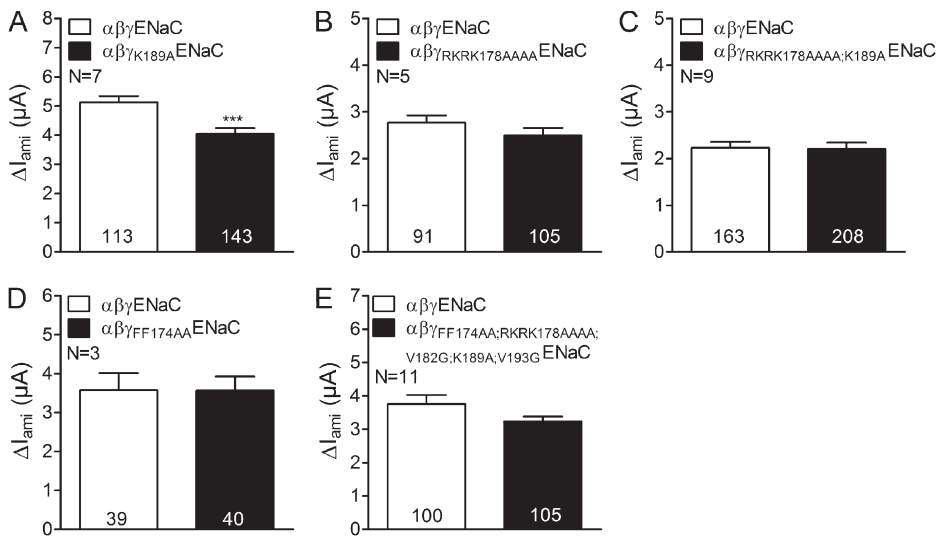

**Figure S1.** Effect of mutated cleavage sites on baseline  $\Delta I_{ami}$ . (A–E) Mean baseline  $\Delta I_{ami}$  from experiments as shown in Figs. 2 B (A), 3 B (B), 4 B (C), 10 A (D), and 11 A (E) before incubation in protease-containing solution. The results indicate that the mutations per se have no major impact on baseline ENaC function. Numbers inside the columns indicate the number of individual oocytes measured. *N* indicates the number of different batches of oocytes. \*\*\*,  $P < 0.001$ ; unpaired *t* test.

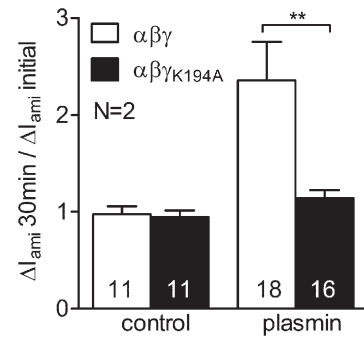

**Figure S2.** The stimulatory effect of plasmin is abolished in oocytes expressing mouse ENaC with a mutated putative plasmin site ( $\gamma_{K194A}$ ). Oocytes expressing mouse  $\alpha\beta\gamma$  (open symbols) or  $\alpha\beta\gamma_{K194A}$  ENaC (closed symbols) were incubated for 30 min in protease-free solution (control) or in solution containing 10  $\mu g/ml$  plasmin. Amiloride-sensitive whole cell currents ( $\Delta I_{ami}$ ) were detected before (–) and after (+) incubation. Columns represent relative stimulatory effect on  $\Delta I_{ami}$  calculated as the ratio of  $\Delta I_{ami}$  measured after a 30-min incubation ( $\Delta I_{ami} 30min$ ) to the initial  $\Delta I_{ami}$  ( $\Delta I_{ami} initial$ ) measured before incubation. Numbers inside the columns indicate the number of individual oocytes measured. *N* indicates the number of different batches of oocytes. \*\*,  $P < 0.01$ ; unpaired *t* test.

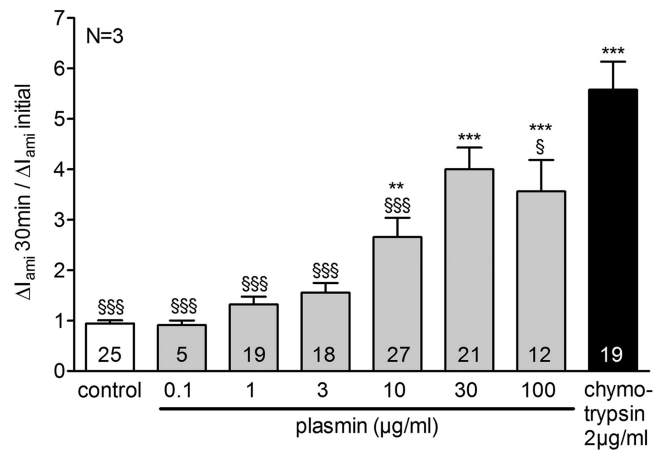

**Figure S3.** Stimulatory effect of plasmin on human ENaC is concentration dependent. Oocytes expressing human  $\alpha\beta\gamma$  ENaC were incubated for 30 min in protease-free solution (control), in solutions containing different concentrations of plasmin (0.1, 1, 3, 10, 30, and 100  $\mu\text{g/ml}$ ), or in a solution containing 2  $\mu\text{g/ml}$  chymotrypsin. Amiloride-sensitive whole cell currents ( $\Delta I_{\text{ami}}$ ) were detected before ( $\Delta I_{\text{ami}}$  initial) and after incubation ( $\Delta I_{\text{ami}}$  30 min). Columns represent the relative stimulatory effect on  $\Delta I_{\text{ami}}$  calculated as the ratio of  $\Delta I_{\text{ami}}$  30 min/ $\Delta I_{\text{ami}}$  initial. Numbers inside the columns indicate the number of individual oocytes measured.  $N$  indicates the number of different batches of oocytes. Statistical significance was tested by using one-way ANOVA followed by Tukey's multiple comparison test versus control (\*\*,  $P < 0.01$ ; \*\*\*,  $P < 0.001$ ) or chymotrypsin (§,  $P < 0.05$ ; §§§,  $P < 0.001$ ).
